# Supplementary material for: Impact of a 6-week non-energy-restricted ketogenic diet on physical fitness, body composition and biochemical parameters in healthy adults
Source: PubMed Central journal article supplement (PMC5319032; doi:10.1186/s12986-017-0175-5), 2017-02-20
Supplement: 12986_2017_175_MOESM1_ESM.pdf [file 12986_2017_175_MOESM1_ESM.pdf]

## Additional File 1

**Table S1** Diet compositions (energy, macronutrients, fatty acids, cholesterol, fibre and alcohol)

|                                                   | Unit | Habitual diet        | KD                    | P-value |
|---------------------------------------------------|------|----------------------|-----------------------|---------|
| <b>Energy, macronutrients, fibers and alcohol</b> |      |                      |                       |         |
| Energy                                            | kcal | 2320.9 ± 551.3       | 2223.6 ± 583.7        | 0.186   |
| Fat                                               | g    | 99.4 ± 26.7          | 174.0 ± 52.6          | <0.001  |
| Fat                                               | E %  | 41.0 ± 5.2           | 71.6 ± 5.0            | <0.001  |
| Carbohydrates                                     | g    | 233.4 ± 69.9         | 40.4 ± 13.1           | <0.001  |
| Carbohydrates                                     | E %  | 42.9 ± 6.5           | 7.7 ± 2.6             | <0.001  |
| Protein                                           | g    | 75.0 (46.3 - 192.2)  | 105.7 (59.4 - 255.5)  | <0.001  |
| Protein                                           | E %  | 15.0 (12.3 - 29.5)   | 20.9 (14.1 - 31.4)    | <0.001  |
| Fibre                                             | g    | 22.3 (11.7 - 182.1)  | 21.2 (9.6 - 40.3)     | 0.053   |
| Alcohol                                           | g    | 5.7 (0 - 45.1)       | 0.5 (0 - 24.9)        | <0.001  |
| <b>Fatty acids and cholesterol</b>                |      |                      |                       |         |
| Saturated fats                                    | g    | 41.0 ± 11.0          | 68.0 ± 22.0           | <0.001  |
| Saturated fats                                    | E %  | 16.3 ± 3.0           | 27.9 ± 4.9            | <0.001  |
| Monounsaturated fats                              | g    | 32.7 ± 9.8           | 62.8 ± 20.0           | <0.001  |
| Monounsaturated fats                              | E %  | 13.0 ± 2.5           | 25.8 ± 4.3            | <0.001  |
| Polyunsaturated fats                              | g    | 12.39 (6.80 - 32.71) | 22.25 (12.24 - 39.57) | <0.001  |
| Polyunsaturated fats                              | E %  | 5.6 ± 1.8            | 9.8 ± 2.8             | <0.001  |
| Eicosapentaenoic acids                            | g    | 0.04 (0 - 0.37)      | 0.19 (0 - 0.57)       | <0.001  |
| Docosapentaenoic acids                            | g    | 0.12 (0 - 0.67)      | 0.32 (0.01 - 1.04)    | 0.001   |
| Linoleic acid (n-6)                               | g    | 11.5 ± 4.5           | 17.6 ± 8.3            | <0.001  |
| Linolenic acid (n-3)                              | g    | 1.34 (0.56 - 13.24)  | 3.10 (1.03 - 11.80)   | <0.001  |
| Linoleic /linolenic acid ratio                    |      | 8.1 ± 3.5            | 6.0 ± 3.0             | 0.003   |
| Cholesterol                                       | mg   | 321.2 ± 123.6        | 495.4 ± 167.0         | <0.001  |

Abbreviations: n-3 = omega-3 fatty acid, n-6 = omega-6 fatty acid

**Table S2** Diet compositions (vitamins, minerals and trace elements)

|                             | Unit | Habitual diet           | KD                      | Reference range | P-value |
|-----------------------------|------|-------------------------|-------------------------|-----------------|---------|
| <b>Fat-soluble vitamins</b> |      |                         |                         |                 |         |
| Retinol equivalents         | µg   | 1286.9 (500.1 - 7842.2) | 1662.6 (764.4 - 4689.4) | 800 - 1000      | 0.005   |
| Vitamin D (calciferol)      | µg   | 2.36 (1.09 - 7.56)      | 4.46 (1.80 - 13.50)     | 20              | <0.001  |
| Vitamin E (tocopherol)      | mg   | 14.0 ± 5.4              | 18.5 ± 6.7              | 12              | <0.001  |
| Vitamin K                   | µg   | 129.0 (31.1 - 826.7)    | 147.4 (43.3 - 582.3)    | 60 - 70         | 0.639   |

| <b>Water-soluble vitamins</b>      |    |                              |                             |           |        |
|------------------------------------|----|------------------------------|-----------------------------|-----------|--------|
| Vitamin B1 (thiamin)               | mg | 1.14 (0.56 - 2.70)           | 1.17 (0.57 - 2.97)          | 1.0 - 1.2 | 0.247  |
| Vitamin B2 (riboflavin)            | mg | 1.58 (0.86 - 5.23)           | 1.66 (1.02 - 3.43)          | 1.1 - 1.4 | 0.657  |
| Vitamin B3 (niacin)                | µg | 28.7 (17.0 -66.6)            | 35.5 (17.1 -79.6)           | 12 - 15   | 0.035  |
| Vitamin B5<br>(pantothenic acid)   | mg | 4.65 (2.41 - 13.50)          | 4.46 (2.43 - 9.94)          | 6         | 0.033  |
| Vitamin B6<br>(pyridoxine)         | mg | 1.51 (0.70 - 3.60)           | 1.35 (0.68 - 3.34)          | 1.2 - 1.5 | 0.047  |
| Vitamin B7 (biotin)                | µg | 50.8 (26.9 - 189.0)          | 45.5 (19.9 - 98.6)          | 30 - 60   | 0.003  |
| Vitamin B9 (folic acid)            | µg | 261.6 (144.0 -<br>1146.7)    | 272.4 (159.4 -<br>575.6)    | 300       | 0.385  |
| Vitamin B12<br>(cobalamin)         | µg | 4.47 (2.17 - 17.19)          | 6.81 (3.27 - 14.37)         | 3         | <0.001 |
| Vitamin C                          | mg | 104.8 ± 45.4                 | 97.9 ± 45.9                 | 95 - 110  | 0.245  |
| <b>Minerals and trace elements</b> |    |                              |                             |           |        |
| Potassium                          | mg | 3045.1 (1545.6 -<br>10131.6) | 2456.2 (1429.4 -<br>4981.1) | 2000      | <0.001 |
| Calcium                            | mg | 1036.5 (402.0 -<br>2501.9)   | 1147.6 (682.4 -<br>2974.4)  | 1000      | 0.955  |
| Magnesium                          | mg | 398.7 (174.1 -<br>964.4)     | 316.7 (148.1 -<br>697.4)    | 300 - 350 | <0.001 |
| Phosphor                           | mg | 1368.4 (698.6 -<br>2444.3)   | 1408.4 (782.6 -<br>2959.7)  | 700       | 0.520  |
| Iodine                             | µg | 101.2 ± 30.8                 | 121.4 ± 60.3                | 200       | 0.060  |
| Iron                               | mg | 12.7 (5.1 - 61.2)            | 9.0 (4.8 - 19.5)            | 10 - 15   | <0.001 |
| Zinc                               | mg | 11.7 ± 3.4                   | 12.0 ± 3.5                  | 7 - 10    | 0.597  |
| Selenium                           | µg | 0.14 (0 - 18.3)              | 0 (0 - 33.3)                | 60 - 70   | 0.016  |

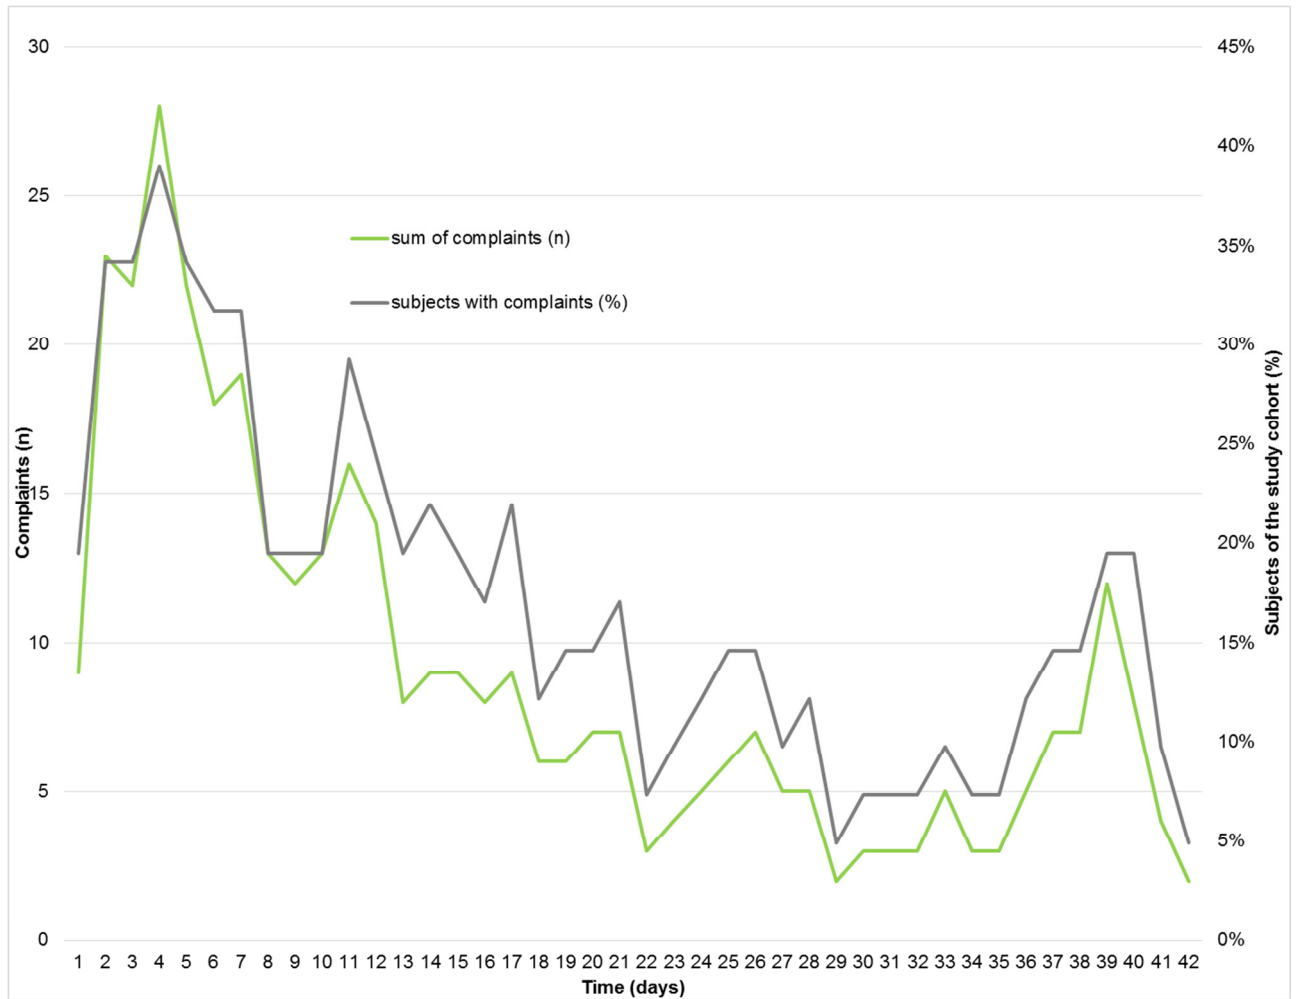

**Figure S1** Sum of complaints/adverse events and number of subjects reporting these complaints via daily records during the study course

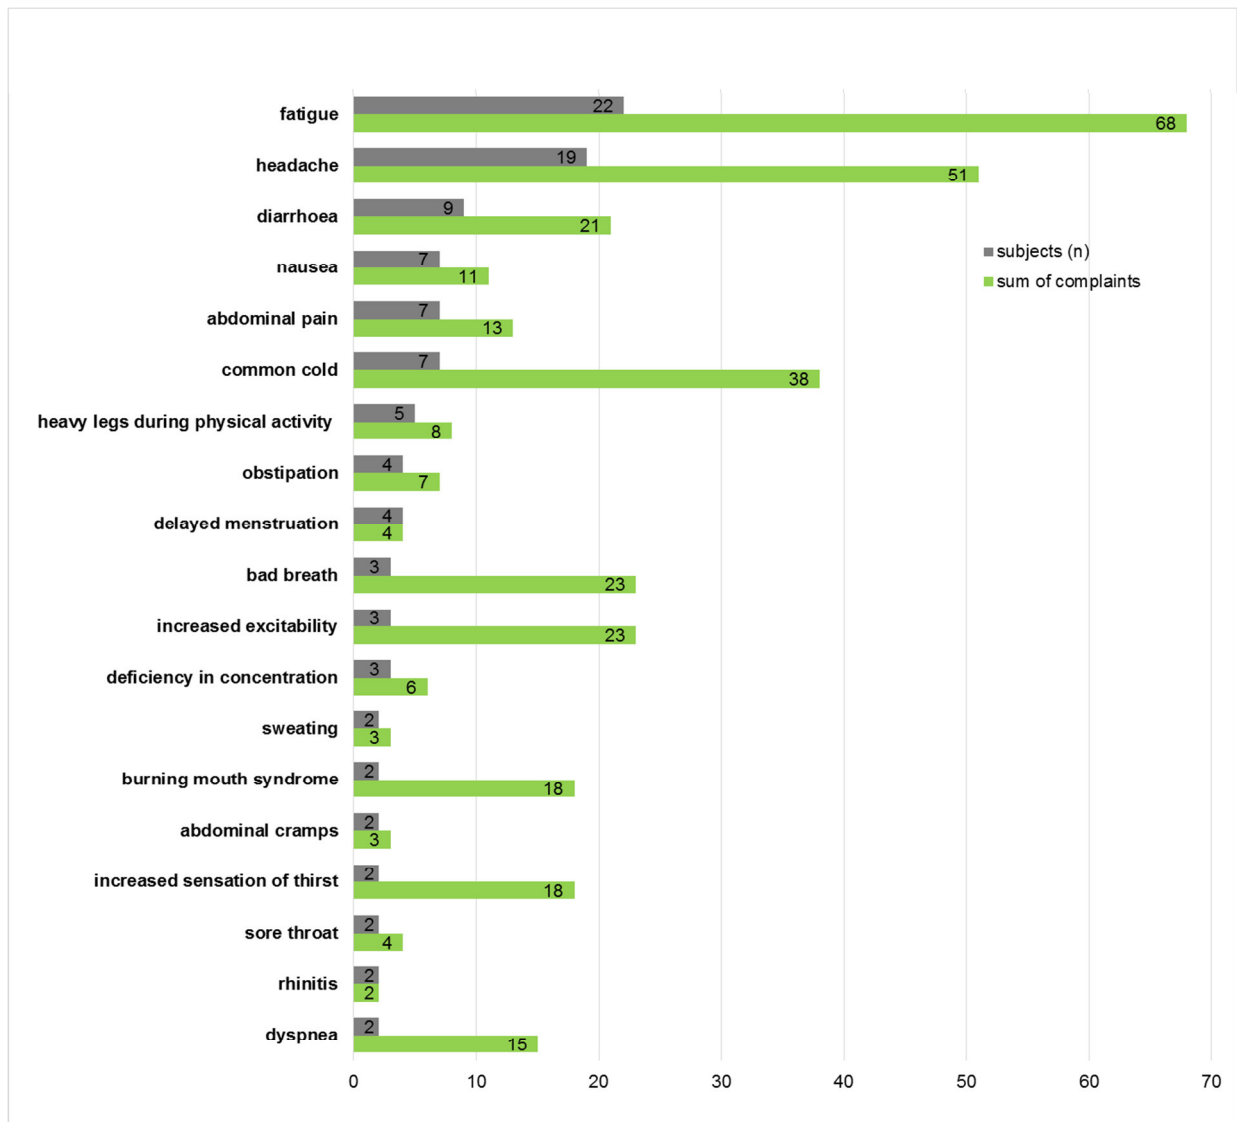

**Figure S2** Itemised complaints/adverse events occurring during the complete study period.

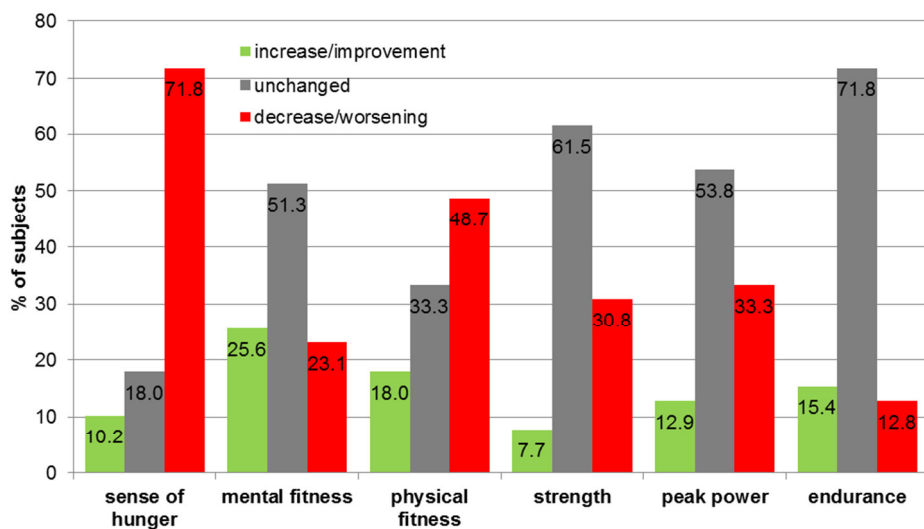

**Figure S3** Subjectively-rated physical sensations over the KD period assessed at POST via a non-validated questionnaire.
